OCTOBER 2023 | VOLUME 74 | NUMBER 10

# Psychiatric Services

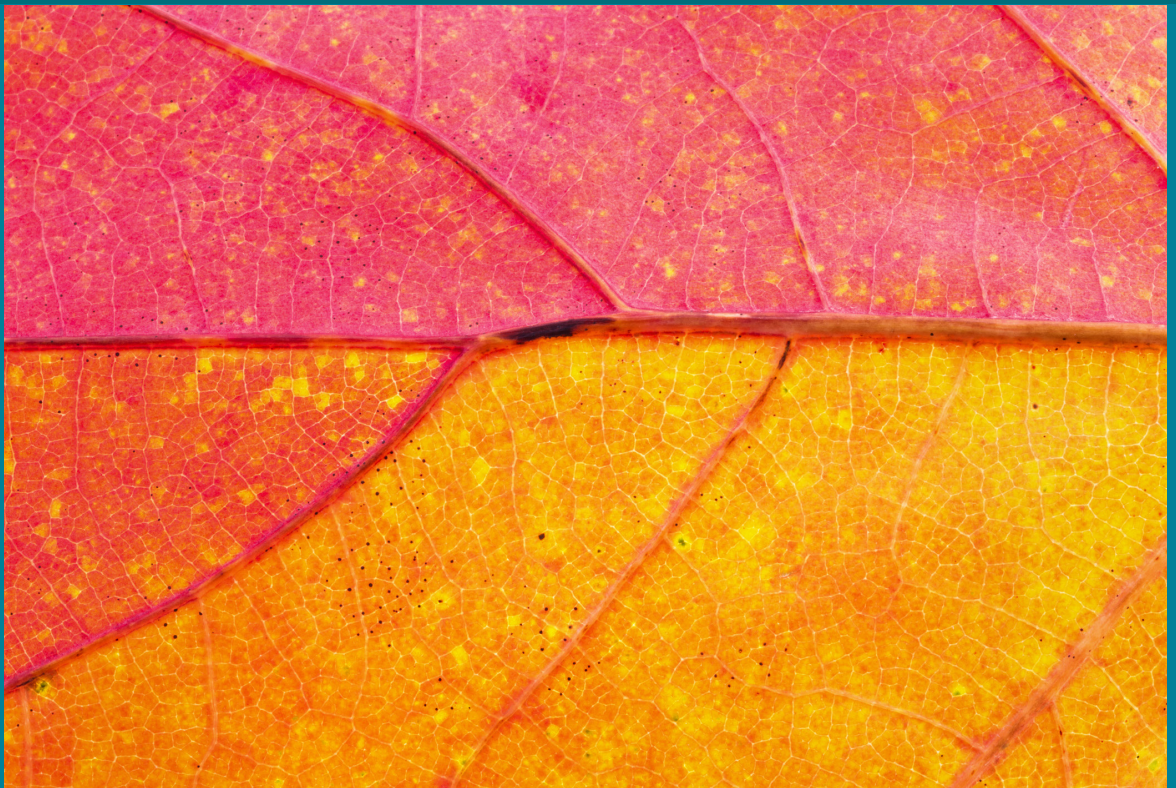

Using social cognitive theory to inform treatment of self-stigma in PTSD

How to reach a mobile crisis team

Handling the increasing prevalence of drugs laced with fentanyl

Anxiety and depression symptoms of essential U.S. workers during the pandemic

AMERICAN  
**PSYCHIATRIC**  
ASSOCIATION 

[ps.psychiatryonline.org](https://ps.psychiatryonline.org)
