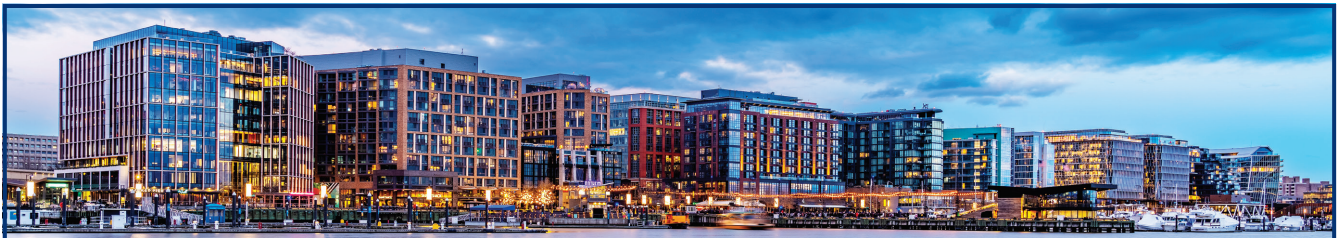

# CEO/Medical Director Search

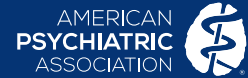

APA seeks a dynamic, strategic leader to serve as the organization's next **Chief Executive Officer and Medical Director**.

The CEO and Medical Director of APA will serve as a national leader for the psychiatric profession at a key moment when the field is in a time of flux. The successful candidate will inherit a strong organization that is well positioned to meet the challenges facing the profession of psychiatry and will leverage APA's role as a convener to provide forums for discussion and idea sharing to meet these challenges.

The next CEO and Medical Director should be a dynamic leader who can work with

various constituents, including the Board, staff, and members, to develop and implement a transformational strategy that meets the needs of its members and the moment in time for the profession.

The Board has appointed a search committee and retained Heidrick & Struggles to lead the search for APA's next CEO.

The full position specification, with a full list of responsibilities and criteria for the next CEO and Medical Director, can be found on **APA's website**.

Initial screening of applicants will begin immediately and continue until the position is filled.

**Nominations and applications should be directed to [APACEO@heidrick.com](mailto:APACEO@heidrick.com)**

*The APA will not discriminate against any employee or applicant for employment on the basis of race, color, religion, sex (including sexual orientation, gender identity, and pregnancy), national origin, age (40 and older), disability, marital status, and genetic information in accordance with applicable federal, state, or local law.*

*All APA employees are required to be fully vaccinated against COVID-19 with a vaccine approved or authorized by the World Health Organization or U.S. Food and Drug Administration. Proof of vaccination, or having an accommodation request approved by APA, is required.*

See complete position description:

[apapsy.ch/apa-ceo-post](http://apapsy.ch/apa-ceo-post)

## APA Publishing **Audio Books** Listen anytime, anywhere

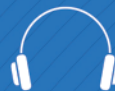

Purchase and listen at [appi.org](http://appi.org)

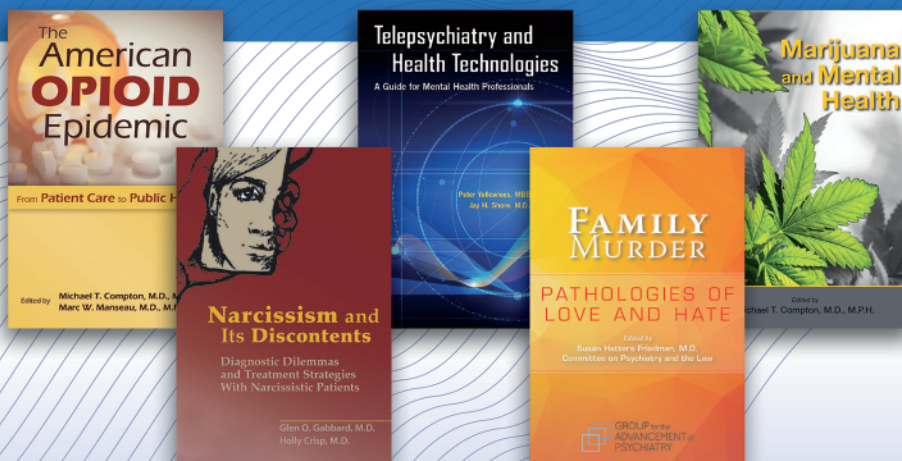

Also available at: Google Podcasts, Apple Podcasts, Spotify, Stitcher, and YouTube

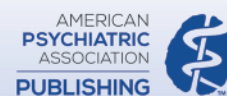

[www.appi.org](http://www.appi.org)  
Email: [appi@psych.org](mailto:appi@psych.org)  
Toll-Free: 1-800-368-5777



Searching for  
the perfect  
psychiatric  
career?

## Let APA JobCentral help!

### Manage Your Career

- Browse hundreds of active job listings!
- Create an account to save jobs, store multiple resumes and cover letters and communicate with employers through our internal messaging system.
- Set up multiple job alerts specifying your skills, interests and location to receive e-mails when employers post jobs that match your criteria.

### Recruit for Open Positions

- Post your job in front of thousands of highly qualified psychiatrists.
- Cross promote your job listing in Psychiatric News.
- Search the anonymous resume database to find your ideal candidate.

AMERICAN  
**PSYCHIATRIC**  
ASSOCIATION

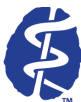

**JOBCENTRAL**  
The Career Hub for Psychiatry

[jobs.psychiatry.org](https://jobs.psychiatry.org)
