# Bringing Psychiatrists & Mental Health Professionals Together to Connect, Collaborate & Influence Systems-level change.

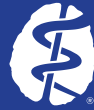

AMERICAN  
PSYCHIATRIC  
ASSOCIATION

THE  
MENTAL  
HEALTH  
SERVICES  
CONFERENCE

Oct. 12-14, 2023  
Washington, D.C.

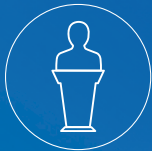

40+  
Sessions

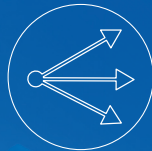

50+  
Topics

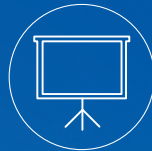

Poster Hall &  
Exhibit Gallery

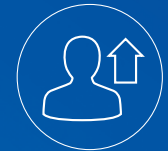

Up to  
17.5 CME\*

The 2023 Mental Health Services Conference will bring psychiatrists and mental health professionals together to collaborate on practical advice to influence systems-level change for their patients. Held in-person in Washington, D.C. at the Capital Hilton Hotel, join us October 12 through 14 as we work together to develop interdisciplinary practical solutions to solve real-world issues.

Not only will you network with psychiatrists looking to encourage change, but the Mental Health Services Conference will be attended by professionals throughout the mental health care field including primary care physicians, nurse practitioners, social workers, and more.

Join us in person to:

- Recognize and improve mental health disparities in the community
- Provide culturally competent care for diverse populations
- Identify barriers to care, including health service delivery issues
- Practical Psychopharmacology and Addictions updates
- Leadership Track
- Training in behavioral management and de-escalation
- Media Training
- And much, much more

Register today at  
[psychiatry.org/MHSC](https://psychiatry.org/MHSC)
